# Supplementary material for: Novel graphene capsule–aminoporphyrin nanohybrids: preparation and application in photodynamic therapy of cancer
Source: Royal Society of Chemistry journal article supplement (doi:10.1039/c7ra08308d), 2017-01-01
Supplement: c7ra08308d1.pdf [file c7ra08308d1.pdf]

† Electronic supplementary information (ESI)

Novel graphene capsule-aminoporphyrin nanohybrids : preparation and  
application in photodynamic therapy of cancer

Guoli Liu,<sup>a</sup> Hongying Lv,<sup>b</sup> Jing Zhao,<sup>a</sup> Shen Zhang<sup>a</sup>, Shuqing Sun<sup>\*a</sup>

<sup>a</sup>Department of Chemistry, College of Science, Tianjin University, Tianjin, 300072, China.

<sup>b</sup>Chinese Academy of Medical Sciences Institute of Radiation Medicine , Tianjin, 300192, China.

Corresponding Author: [sunshuqing@tju.edu.cn](mailto:sunshuqing@tju.edu.cn)

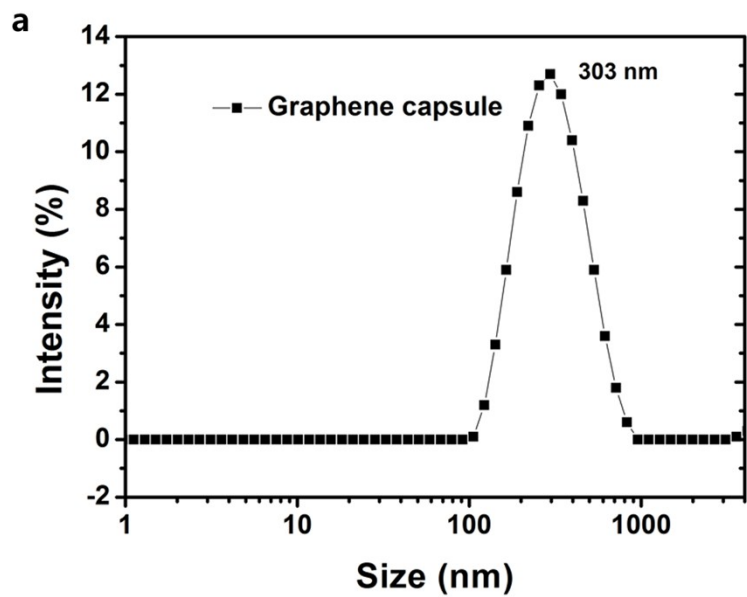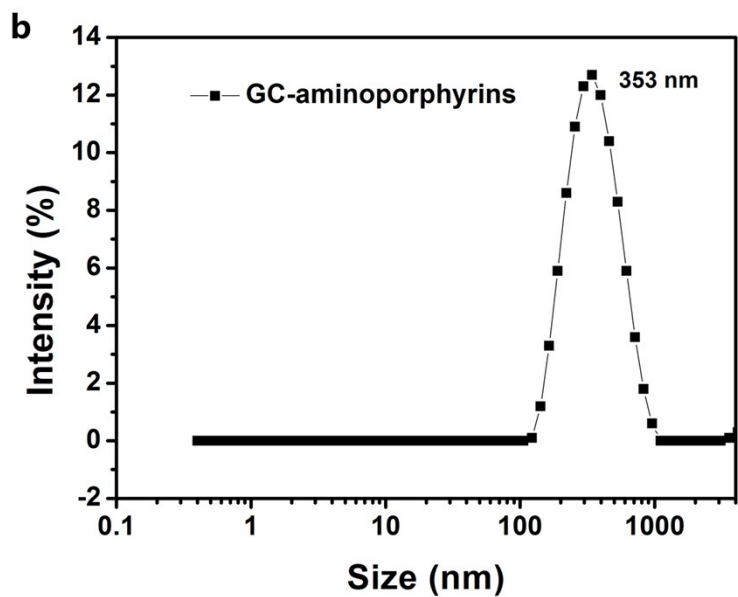

Fig. S1. DLS measurements of graphene capsules(a) and GC-aminoporphyrins.

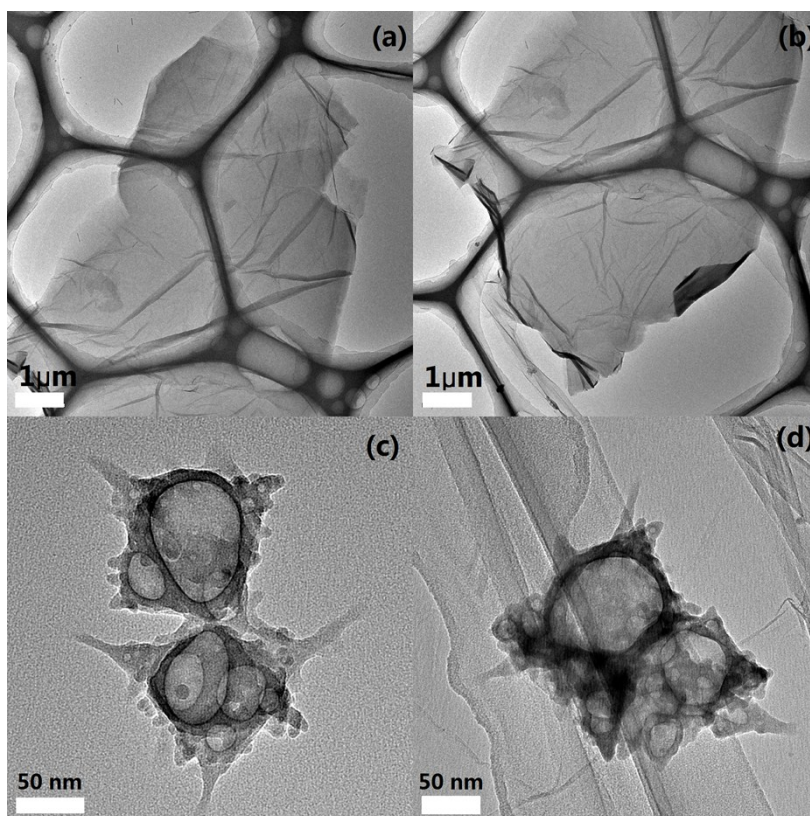

**Fig. S2.** (a,b) TEM images of rGO sheets obtained when the concentration of hydrazine hydrate was below 0.5%. (c,d) TEM images of graphene capsules opened when the concentration of hydrazine hydrate was over 0.8%.

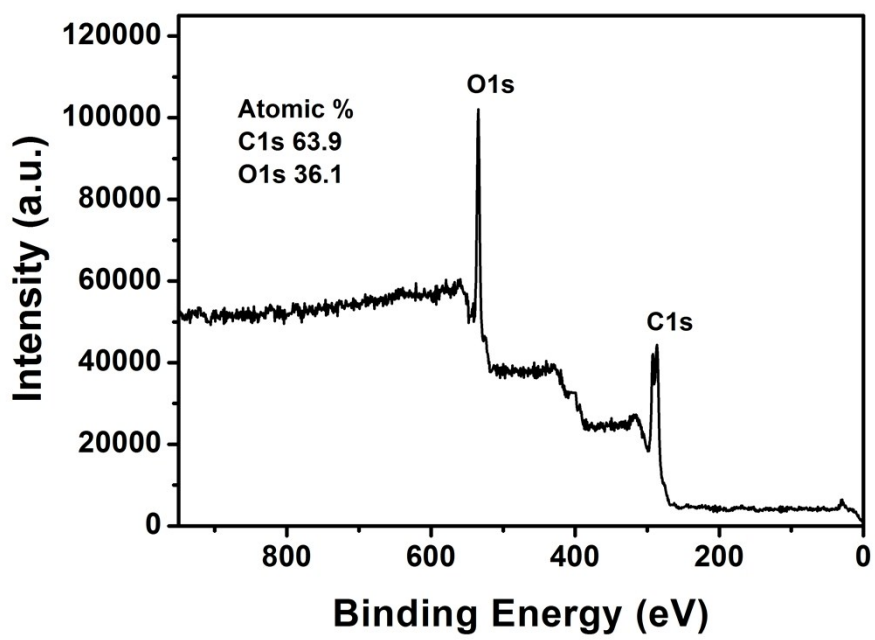

Fig. S3 Wide scan XPS of the GCs.

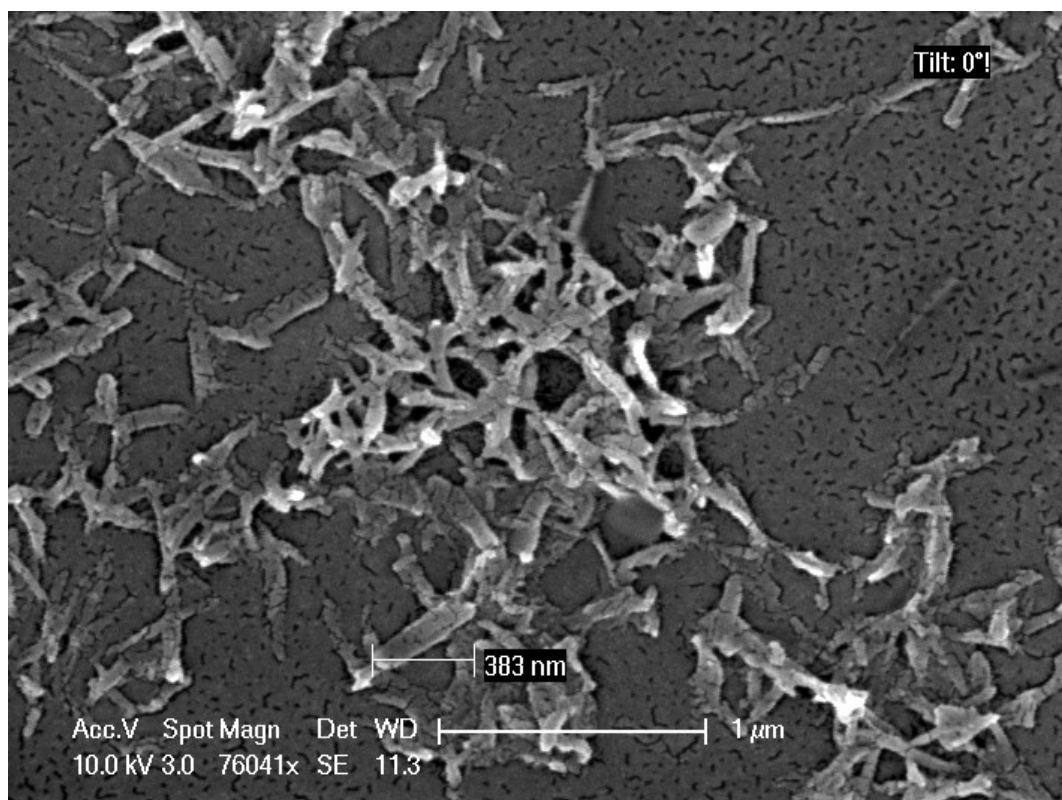

**Fig. S4.** SEM image of aminoporphyrin nanorods
